# Supplementary material for: Versatile phenotype-activated cell sorting
Source: PubMed Central journal article supplement — Sci Adv. 2020 Oct 23;6(43):eabb7438. doi: 10.1126/sciadv.abb7438 (PMC7608836; doi:10.1126/sciadv.abb7438), 2020-10-23
Supplement: abb7438_Supplementary_Statistics.pdf [file abb7438_Supplementary_Statistics.pdf]

## Supplementary statistical analysis for

# Versatile phenotype-activated cell sorting

## General comments

For each experiment, we have noted down sample sizes ( $n$ ), and the types of statistical analysis, and the result of the analysis. For all statistical analysis, significance level of 0.05 was used. Exact  $p$  value is given except when  $p$  value is  $< 0.0001$ .

For sample size greater than 30, normality test was not conducted, and parametric analysis was used. This because violation of normality has a small effect on parametric analysis when the sample size is large (Ref: 64).

To determine the statistical difference between trends, we have calculated areas under the curves (AUCs) and conducted statistical analysis using the AUCs.

## Figure 2B

### Bacteria

#### Sample size

|   | Column A:<br>Neighboring | Column B:<br>Target |
|---|--------------------------|---------------------|
| n | 7 cells                  | 7 cells             |

To analyze statistical difference between the photoactivation trends, areas under the curves (AUCs) of photoactivation ratio ( $RFP/RFP_0$ ) vs. photoactivation duration were determined for individual cells. Logged AUC values were used for the statistical analysis.

#### Shapiro-Wilk normality test

| Shapiro-Wilk test                   | Neighboring | Target |
|-------------------------------------|-------------|--------|
| W                                   | 0.8215      | 0.7734 |
| P value                             | 0.0663      | 0.0221 |
| Passed normality test (alpha=0.05)? | Yes         | No     |
| P value summary                     | ns          | *      |

→ Normality test was not passed.

#### Mann Whitney test

|                                         |            |
|-----------------------------------------|------------|
| Mann Whitney test                       |            |
| P value                                 | 0.0012     |
| Exact or approximate P value?           | Exact      |
| P value summary                         | **         |
| Significantly different ( $P < 0.05$ )? | Yes        |
| One- or two-tailed P value?             | Two-tailed |
| Sum of ranks in column A,B              | 29 , 76    |
| Mann-Whitney U                          | 1          |
| Difference between medians              |            |
| Median of column A                      | 2.836, n=7 |
| Median of column B                      | 3.900, n=7 |
| Difference: Actual                      | 1.063      |
| Difference: Hodges-Lehmann              | 1.035      |

→ The logged AUCs values are significantly different.

### Yeast

### Sample size

|   | Column A:<br>Neighboring | Column B:<br>Target |
|---|--------------------------|---------------------|
| n | 18 cells                 | 18 cells            |

To analyze the statistical difference between the photoactivation trends, areas under the curves (AUCs) of photoactivation ratio ( $RFP/RFP_0$ ) vs. time were determined for individual cells. Logged AUC values were used for the statistical analysis.

### Shapiro-Wilk normality test

| Shapiro-Wilk test                   | Neighboring | Target |
|-------------------------------------|-------------|--------|
| W                                   | 0.9516      | 0.9600 |
| P value                             | 0.4502      | 0.6016 |
| Passed normality test (alpha=0.05)? | Yes         | Yes    |
| P value summary                     | ns          | ns     |

→ Normality test was passed.

### F test to compare variances

| F test to compare variances         |               |
|-------------------------------------|---------------|
| F, DFn, Dfd                         | 1.141, 17, 17 |
| P value                             | 0.7893        |
| P value summary                     | ns            |
| Significantly different (P < 0.05)? | No            |

→ The variances are not significantly different.

### Unpaired t test

|                                        |                |
|----------------------------------------|----------------|
| Unpaired t test                        |                |
| P value                                | <0.0001        |
| P value summary                        | ****           |
| Significantly different (P < 0.05)?    | Yes            |
| One- or two-tailed P value?            | Two-tailed     |
| t, df                                  | t=16.40, df=34 |
| How big is the difference?             |                |
| Mean of column A                       | 2.663          |
| Mean of column B                       | 4.496          |
| Difference between means (B - A) ± SEM | 1.832 ± 0.1118 |
| 95% confidence interval                | 1.605 to 2.059 |
| R squared (eta squared)                | 0.8877         |

→ The logged AUCs values are significantly different.

### Human cell

#### Sample size

|   | Neighboring | Target  |
|---|-------------|---------|
| n | 5 cells     | 5 cells |

To analyze the statistical difference between the photoactivation trends, areas under the curves (AUCs) of photoactivation ratio ( $RFP/RFP_0$ ) vs. time were determined for individual cells. Logged AUC values were used for the statistical analysis.

### Shapiro-Wilk normality test

| Shapiro-Wilk test                   |        |        |
|-------------------------------------|--------|--------|
| W                                   | 0.9022 | 0.8778 |
| P value                             | 0.4222 | 0.2997 |
| Passed normality test (alpha=0.05)? | Yes    | Yes    |

|                 |    |    |
|-----------------|----|----|
| P value summary | ns | ns |
|-----------------|----|----|

→ Both neighboring and target cell groups passed the normality test.

### F test to compare variances

|                                     |             |
|-------------------------------------|-------------|
| F test to compare variances         |             |
| F, DFn, Dfd                         | 16.85, 4, 4 |
| P value                             | 0.0181      |
| P value summary                     | *           |
| Significantly different (P < 0.05)? | Yes         |

→ The variances are significantly different.

### Unpaired t test with Welch's correction

|                                         |                   |
|-----------------------------------------|-------------------|
| Unpaired t test with Welch's correction |                   |
| P value                                 | 0.0105            |
| P value summary                         | *                 |
| Significantly different (P < 0.05)?     | Yes               |
| One- or two-tailed P value?             | Two-tailed        |
| Welch-corrected t, df                   | t=4.227, df=4.473 |

→ The logged AUCs values are significantly different.

## Figure 3

Figure 3B: Human cell

### Sample

|   | Column A:<br>Neighboring | Column B:<br>Target |
|---|--------------------------|---------------------|
| n | 12                       | 12                  |

To analyze the statistical difference between the photoactivation trends, areas under the curves (AUCs) of photoactivation ratio ( $RFP/RFP_0$ ) vs. time were determined for individual cells. Logged AUC values were used for the statistical analysis.

### Shapiro-Wilk normality test

| Shapiro-Wilk test                   | Neighboring | Target |
|-------------------------------------|-------------|--------|
| W                                   | 0.8268      | 0.9114 |
| P value                             | 0.0192      | 0.2222 |
| Passed normality test (alpha=0.05)? | No          | Yes    |
| P value summary                     | *           | ns     |

→ Neighboring cell failed the normality test.

### Mann Whitney test

|                                     |            |
|-------------------------------------|------------|
| Mann Whitney test                   |            |
| P value                             | <0.0001    |
| Exact or approximate P value?       | Exact      |
| P value summary                     | ****       |
| Significantly different (P < 0.05)? | Yes        |
| One- or two-tailed P value?         | Two-tailed |
| Sum of ranks in column A,B          | 78 , 222   |
| Mann-Whitney U                      | 0          |

→ The logged AUCs values are significantly different.

**Figure 3F: Human intestinal enteroids**

**Sample size**

|   | Column A:<br>Neighboring | Column B:<br>Target |
|---|--------------------------|---------------------|
| n | 11 enteroids             | 11 enteroids        |

To analyze the statistical difference between the photoactivation trends, areas under the curves (AUCs) of photoactivation ratio (RFP/RFP<sub>0</sub>) vs. time were determined for individual enteroids. Logged AUC values were used for the statistical analysis.

**Shapiro-Wilk normality test**

| Shapiro-Wilk test                   | Neighboring | Target |
|-------------------------------------|-------------|--------|
| W                                   | 0.9376      | 0.8259 |
| P value                             | 0.4932      | 0.0206 |
| Passed normality test (alpha=0.05)? | Yes         | No     |
| P value summary                     | ns          | *      |

→ Normality test was not passed.

**Mann Whitney test**

|                                     |             |
|-------------------------------------|-------------|
| Mann Whitney test                   |             |
| P value                             | <0.0001     |
| Exact or approximate P value?       | Exact       |
| P value summary                     | ****        |
| Significantly different (P < 0.05)? | Yes         |
| One- or two-tailed P value?         | Two-tailed  |
| Sum of ranks in column A,B          | 66 , 187    |
| Mann-Whitney U                      | 0           |
| Difference between medians          |             |
| Median of column A                  | 145.3, n=11 |
| Median of column B                  | 1496, n=11  |
| Difference: Actual                  | 1351        |
| Difference: Hodges-Lehmann          | 1322        |

→ The logged AUCs values are significantly different.

**Figure 4H**

**Sample size**

|             | Column A:<br>Before<br>photoactivation | Column B:<br>After<br>photoactivation |
|-------------|----------------------------------------|---------------------------------------|
| Neighboring | 45 cells                               | 45 cells                              |

Logged fluorescence values were used for statistical analysis.

**Ratio paired t test**

|                                     |         |
|-------------------------------------|---------|
| Ratio paired t test                 |         |
| P value                             | <0.0001 |
| P value summary                     | ****    |
| Significantly different (P < 0.05)? | Yes     |

|                                          |                |
|------------------------------------------|----------------|
| One- or two-tailed P value?              | Two-tailed     |
| t, df                                    | t=79.46, df=44 |
| Number of pairs                          | 45             |
| How big is the difference?               |                |
| Geometric mean of ratios (B / A)         | 2.013          |
| SD of log(ratios)                        | 0.02565        |
| SEM of log(ratios)                       | 0.003824       |
| 95% confidence interval                  | 1.978 to 2.049 |
| R squared (partial eta squared)          | 0.9931         |
| How effective was the pairing?           |                |
| Correlation coefficient (r)              | 0.8938         |
| P value (one tailed)                     | <0.0001        |
| P value summary                          | ****           |
| Was the pairing significantly effective? | Yes            |

→ The logged fluorescence values are significantly different.

## Figure 5

Figure 5A: Photobleaching half-life comparison in yeast

### Sample size (cells)

|         | mVenus      |             |             | mCitrine    |             |             |
|---------|-------------|-------------|-------------|-------------|-------------|-------------|
|         | replicate 1 | replicate 2 | replicate 3 | replicate 1 | replicate 2 | replicate 3 |
| Trial 1 | 1143        | 694         | 1341        | 864         | 776         | 1614        |
| Trial 2 | 1988        | 2817        | 2872        | 1010        | 2692        | 659         |
|         |             |             |             |             |             |             |
|         | Ypet        |             |             | mGold       |             |             |
|         | replicate 1 | replicate 2 | replicate 3 | replicate 1 | replicate 2 | replicate 3 |
| Trial 1 | 420         | 700         | 742         | 2363        | 484         | 603         |
| Trial 2 | 1939        | 2319        | 4613        | 1493        | 3225        | 2960        |

For each replicate, the photobleaching half-lives of individual cells were determined and the mean photobleaching half-life was calculated (of the replicate). These mean photobleaching half-life values were used for statistical analysis. n = 6 biological replicates.

### Brown-Forsythe test

|                                             |               |
|---------------------------------------------|---------------|
| Brown-Forsythe test                         |               |
| F (DFn, DFd)                                | 3.859 (3, 20) |
| P value                                     | 0.0250        |
| P value summary                             | *             |
| Are SDs significantly different (P < 0.05)? | Yes           |

→ The variances are significantly different.

### Welch's ANOVA test

|                                           |                            |
|-------------------------------------------|----------------------------|
| Welch's ANOVA test                        |                            |
| W (DFn, DFd)                              | 134.4<br>(3.000,<br>10.76) |
| P value                                   | <0.0001                    |
| P value summary                           | ****                       |
| Significant diff. among means (P < 0.05)? | Yes                        |

→ The photobleaching half-life values are significantly different.

### Dunnett's T3 multiple comparisons test

| Dunnett's T3 multiple comparisons test | Mean Diff. | 95.00% CI of diff. | Significant? | Summary     | Adjusted P Value |    |       |       |
|----------------------------------------|------------|--------------------|--------------|-------------|------------------|----|-------|-------|
| <b>mGold vs. mVenus</b>                | 71.65      | 59.23 to 84.07     | Yes          | ****        | <0.0001          |    |       |       |
| <b>mCitrine vs. mGold</b>              | -68.53     | -81.01 to -56.04   | Yes          | ****        | <0.0001          |    |       |       |
| <b>Ypet vs. mGold</b>                  | -65.46     | -78.06 to -52.87   | Yes          | ****        | <0.0001          |    |       |       |
| Test details                           | Mean 1     | Mean 2             | Mean Diff.   | SE of diff. | n1               | n2 | t     | DF    |
| <b>mGold vs. mVenus</b>                | 95.79      | 24.15              | 71.65        | 3.477       | 6                | 6  | 20.60 | 7.206 |
| <b>mCitrine vs. mGold</b>              | 27.27      | 95.79              | -68.53       | 3.496       | 6                | 6  | 19.60 | 7.319 |
| <b>Ypet vs. mGold</b>                  | 30.33      | 95.79              | -65.46       | 3.337       | 6                | 6  | 19.61 | 6.330 |

→ The photobleaching half-life values of mGold and mVenus are significantly different.

Figure 5A: Brightness comparison in yeast

Sample size (cells)

Same as above

Brown-Forsythe test

|                                             |                |
|---------------------------------------------|----------------|
| Brown-Forsythe test                         |                |
| F (DFn, DFd)                                | 0.6983 (3, 20) |
| P value                                     | 0.5640         |
| P value summary                             | ns             |
| Are SDs significantly different (P < 0.05)? | No             |

→ The variances are not significantly different.

Ordinary one-way ANOVA test

|                                           |         |
|-------------------------------------------|---------|
| ANOVA summary                             |         |
| F                                         | 21.51   |
| P value                                   | <0.0001 |
| P value summary                           | ****    |
| Significant diff. among means (P < 0.05)? | Yes     |

→ The brightness values are significantly different.

Bonferroni's multiple comparisons test

| Bonferroni's multiple comparisons test | Mean Diff. | 95.00% CI of diff.  | Significant? | Summary     | Adjusted P Value |    |       |    |
|----------------------------------------|------------|---------------------|--------------|-------------|------------------|----|-------|----|
| <b>mGold vs. mVenus</b>                | 0.06078    | -0.002570 to 0.1241 | No           | ns          | 0.0591           |    |       |    |
| Test details                           | Mean 1     | Mean 2              | Mean Diff.   | SE of diff. | n1               | n2 | t     | DF |
| <b>mGold vs. mVenus</b>                | 0.5070     | 0.4463              | 0.06078      | 0.03037     | 6                | 6  | 2.001 | 20 |

→ The brightness values of mGold and mVenus are not significantly different.

Figure 5A: Photobleaching half-life comparison in human cells

Sample size (cells)

|         | mVenus      |             |             | mCitrine    |             |             |
|---------|-------------|-------------|-------------|-------------|-------------|-------------|
|         | replicate 1 | replicate 2 | replicate 3 | replicate 1 | replicate 2 | replicate 3 |
| Trial 1 | 183         | 206         | 152         | 215         | 320         | 170         |
| Trial 2 | 165         | 161         | 140         | 191         | 159         | 182         |
|         | Ypet        |             |             | mGold       |             |             |

|         | replicate 1 | replicate 2 | replicate 3 | replicate 1 | replicate 2 | replicate 3 |
|---------|-------------|-------------|-------------|-------------|-------------|-------------|
| Trial 1 | 175         | 235         | 325         | 219         | 197         | 208         |
| Trial 2 | 234         | 215         | 127         | 216         | 267         | 164         |

For each replicate, the photobleaching half-lives of individual cells were determined and the mean photobleaching half-life was calculated (of the replicate). These mean photobleaching half-life values were used for statistical analysis. n = 6 biological replicates.

#### Brown-Forsythe test

|                                             |               |
|---------------------------------------------|---------------|
| Brown-Forsythe test                         |               |
| F (DFn, DFd)                                | 7.235 (3, 20) |
| P value                                     | 0.0018        |
| P value summary                             | **            |
| Are SDs significantly different (P < 0.05)? | Yes           |

→ The variances are significantly different.

#### Welch's ANOVA test

|                                           |                     |
|-------------------------------------------|---------------------|
| Welch's ANOVA test                        |                     |
| W (DFn, DFd)                              | 3443 (3.000, 10.45) |
| P value                                   | <0.0001             |
| P value summary                           | ****                |
| Significant diff. among means (P < 0.05)? | Yes                 |

→ The photobleaching half-life values are significantly different.

#### Dunnett's T3 multiple comparisons test

| Dunnett's T3 multiple comparisons test | Mean Diff. | 95.00% CI of diff. | Significant? | Summary     | Adjusted P Value |    |       |       |  |
|----------------------------------------|------------|--------------------|--------------|-------------|------------------|----|-------|-------|--|
| mGold vs. mVenus                       | 168.4      | 163.0 to 173.9     | Yes          | ****        | <0.0001          |    |       |       |  |
| <b>Ypet vs. mGold</b>                  | -160.8     | -167.9 to -153.6   | Yes          | ****        | <0.0001          |    |       |       |  |
| <b>mCitrine vs. mGold</b>              | -186.1     | -192.8 to -179.4   | Yes          | ****        | <0.0001          |    |       |       |  |
| Test details                           | Mean 1     | Mean 2             | Mean Diff.   | SE of diff. | n1               | n2 | t     | DF    |  |
| mGold vs. mVenus                       | 218.9      | 50.41              | 168.4        | 1.830       | 6                | 6  | 92.07 | 6.338 |  |
| <b>Ypet vs. mGold</b>                  | 58.09      | 218.9              | -160.8       | 1.749       | 6                | 6  | 91.90 | 5.387 |  |
| <b>mCitrine vs. mGold</b>              | 32.74      | 218.9              | -186.1       | 1.773       | 6                | 6  | 105.0 | 5.670 |  |

→ The photobleaching half-life values of mGold and mVenus are significantly different.

#### Figure 5A: Brightness comparison in human cells

##### Sample size (cells)

Same as above.

#### Brown-Forsythe test

|                                             |               |
|---------------------------------------------|---------------|
| Brown-Forsythe test                         |               |
| F (DFn, DFd)                                | 1.903 (3, 20) |
| P value                                     | 0.1617        |
| P value summary                             | ns            |
| Are SDs significantly different (P < 0.05)? | No            |

→ The variances are not significantly different.

#### Ordinary one-way ANOVA test

|               |         |
|---------------|---------|
| ANOVA summary |         |
| F             | 21.51   |
| P value       | <0.0001 |

|                                           |      |
|-------------------------------------------|------|
| P value summary                           | **** |
| Significant diff. among means (P < 0.05)? | Yes  |

→ The brightness values are significantly different.

Bonferroni's multiple comparisons test

| Bonferroni's multiple comparisons test | Mean Diff. | 95.00% CI of diff. | Significant? | Summary     | Adjusted P Value |    |        |    |
|----------------------------------------|------------|--------------------|--------------|-------------|------------------|----|--------|----|
| mGold vs. mVenus                       | -0.1302    | -0.4299 to 0.1695  | No           | ns          | 0.3757           |    |        |    |
| Test details                           | Mean 1     | Mean 2             | Mean Diff.   | SE of diff. | n1               | n2 | t      | DF |
| mGold vs. mVenus                       | 2.540      | 2.671              | -0.1302      | 0.1437      | 6                | 6  | 0.9060 | 20 |

→ The brightness values of mGold and mVenus are not significantly different.

Figure 5B: Photobleaching half-life vs. irradiance in yeast

Sample size (cells)

| Irradiance (mW/mm <sup>2</sup> ) | Column A: mVenus |             |             | Column B: mGold |             |             |
|----------------------------------|------------------|-------------|-------------|-----------------|-------------|-------------|
|                                  | Replicate 1      | Replicate 2 | Replicate 3 | Replicate 1     | Replicate 2 | Replicate 3 |
| 6.01                             | 1154             | 957         | 1265        | 727             | 1989        | 2193        |
| 10.9                             | 1260             | 989         | 1265        | 662             | 2064        | 2196        |
| 14.6                             | 1169             | 919         | 1292        | 758             | 2030        | 2087        |
| 17.6                             | 1300             | 980         | 1312        | 860             | 2063        | 2199        |
| 20.1                             | 1203             | 1024        | 1421        | 828             | 2002        | 639         |

For each replicate, the photobleaching half-lives of individual cells were determined and the mean photobleaching half-life (of the replicate) was calculated. These mean photobleaching half-life values were used to determine the AUCs of irradiance vs. photobleaching half-life curves. Statistical analysis was conducted on the AUCs; n = 3 biological replicates.

F test to compare variances

|                                     |             |
|-------------------------------------|-------------|
| F test to compare variances         |             |
| F, DFn, Dfd                         | 43.47, 2, 2 |
| P value                             | 0.0450      |
| P value summary                     | *           |
| Significantly different (P < 0.05)? | Yes         |

→ The variances are significantly different.

Unpaired t test with Welch's correction

|                                         |                   |
|-----------------------------------------|-------------------|
| Unpaired t test with Welch's correction |                   |
| P value                                 | 0.0126            |
| P value summary                         | *                 |
| Significantly different (P < 0.05)?     | Yes               |
| One- or two-tailed P value?             | Two-tailed        |
| Welch-corrected t, df                   | t=8.238, df=2.092 |
| How big is the difference?              |                   |
| Mean of column A                        | 451.1             |
| Mean of column B                        | 2165              |



|                                        |               |
|----------------------------------------|---------------|
| Difference between means (B - A) ± SEM | 1714 ± 208.1  |
| 95% confidence interval                | 855.4 to 2572 |
| R squared (eta squared)                | 0.9701        |

→ The AUCs values are significantly different.

#### Multiple t-test with Holm-Sidak method

For each irradiance, t-test was conducted to analyze the difference between photobleaching half-life values of mVenus and mGold.

| Irradiance (mW/mm <sup>2</sup> ) | Significant? | P value | Mean of mVenus | Mean of mGold | Difference | SE of difference | t ratio | df    | Adjusted P Value |
|----------------------------------|--------------|---------|----------------|---------------|------------|------------------|---------|-------|------------------|
| 6.01                             | Yes          | 0.0098  | 62.16          | 233.3         | -171.1     | 36.99            | 4.626   | 4.000 | 0.0098           |
| 10.9                             | Yes          | 0.0039  | 32.74          | 181.5         | -148.8     | 24.76            | 6.009   | 4.000 | 0.0077           |
| 14.6                             | Yes          | <0.0001 | 25.17          | 131.2         | -106.0     | 6.239            | 16.99   | 4.000 | 0.0004           |
| 17.6                             | Yes          | 0.0008  | 19.80          | 96.82         | -77.02     | 8.336            | 9.239   | 4.000 | 0.0023           |
| 20.1                             | Yes          | 0.0002  | 16.26          | 89.89         | -73.63     | 5.800            | 12.69   | 4.000 | 0.0009           |

→ The photobleaching half-life values at each irradiance are significantly different.

Figure 5B: Photobleaching half-life vs. irradiance in human cells

#### Sample size (cells)

| Irradiance (mW/mm <sup>2</sup> ) | Column A: mVenus |             |             | Column B: mGold |             |             |
|----------------------------------|------------------|-------------|-------------|-----------------|-------------|-------------|
|                                  | Replicate 1      | Replicate 2 | Replicate 3 | Replicate 1     | Replicate 2 | Replicate 3 |
| 6.01                             | 196              | 184         | 313         | 330             | 267         | 242         |
| 10.9                             | 199              | 289         | 273         | 351             | 331         | 260         |
| 14.6                             | n/a              | 307         | 326         | 341             | 272         | 117         |
| 17.6                             | 179              | 298         | 321         | 262             | 257         | 151         |
| 20.1                             | 185              | 288         | 252         | 270             | 215         | 252         |

For each replicate, the photobleaching half-lives of individual cells were determined and the mean photobleaching half-life (of the replicate) was calculated. These mean photobleaching half-life values were used to determine the AUCs of irradiance vs. photobleaching half-life curves. Statistical analysis was conducted on the AUCs; n = 3 biological replicates.

#### F test to compare variances

|                                      |             |
|--------------------------------------|-------------|
| F test to compare variances          |             |
| F, DF <sub>n</sub> , DF <sub>d</sub> | 8.274, 2, 2 |
| P value                              | 0.2156      |
| P value summary                      | ns          |
| Significantly different (P < 0.05)?  | No          |

→ The variances are not significantly different.

#### Unpaired t test

|                                     |               |
|-------------------------------------|---------------|
| Unpaired t test                     |               |
| P value                             | <0.0001       |
| P value summary                     | ****          |
| Significantly different (P < 0.05)? | Yes           |
| One- or two-tailed P value?         | Two-tailed    |
| t, df                               | t=40.76, df=4 |
| How big is the difference?          |               |
| Mean of column A                    | 1296          |



|                                        |                 |                                    |            |                |         |          |           |           |
|----------------------------------------|-----------------|------------------------------------|------------|----------------|---------|----------|-----------|-----------|
| PAmCherry plasmid vs. PAtagRFP plasmid | 0.482<br>5      | 0.465<br>1 to<br>0.500<br>0        | Yes        | ****           | <0.0001 |          |           |           |
| PAmCherry plasmid vs. PAmKate plasmid  | 1.343           | 1.327<br>to<br>1.360               | Yes        | ****           | <0.0001 |          |           |           |
| PAmCherry plasmid vs. PAmCherry genome | 0.987<br>9      | 0.971<br>3 to<br>1.005             | Yes        | ****           | <0.0001 |          |           |           |
| PAtagRFP plasmid vs. PAmKate plasmid   | 0.860<br>7      | 0.846<br>3 to<br>0.875<br>0        | Yes        | ****           | <0.0001 |          |           |           |
| PAtagRFP plasmid vs. PAmCherry genome  | 0.505<br>4      | 0.491<br>0 to<br>0.519<br>8        | Yes        | ****           | <0.0001 |          |           |           |
| PAmKate plasmid vs. PAmCherry genome   | -<br>0.355<br>3 | -<br>0.368<br>7 to -<br>0.341<br>9 | Yes        | ****           | <0.0001 |          |           |           |
| Test details                           | Mean<br>1       | Mean<br>2                          | Mean Diff. | SE of<br>diff. | n1      | n2       | t         | DF        |
| PAmCherry plasmid vs. PAtagRFP plasmid | 5.075           | 4.592                              | 0.4825     | 0.00678<br>8   | 8848    | 646<br>5 | 71.0<br>9 | 1521<br>6 |
| PAmCherry plasmid vs. PAmKate plasmid  | 5.075           | 3.732                              | 1.343      | 0.00648<br>0   | 8848    | 727<br>1 | 207.<br>3 | 1511<br>8 |
| PAmCherry plasmid vs. PAmCherry genome | 5.075           | 4.087                              | 0.9879     | 0.00648<br>1   | 8848    | 662<br>6 | 152.<br>4 | 1480<br>9 |
| PAtagRFP plasmid vs. PAmKate plasmid   | 4.592           | 3.732                              | 0.8607     | 0.00558<br>8   | 6465    | 727<br>1 | 154.<br>0 | 1325<br>6 |
| PAtagRFP plasmid vs. PAmCherry genome  | 4.592           | 4.087                              | 0.5054     | 0.00559<br>0   | 6465    | 662<br>6 | 90.4<br>1 | 1282<br>9 |
| PAmKate plasmid vs. PAmCherry genome   | 3.732           | 4.087                              | -0.3553    | 0.00521<br>1   | 7271    | 662<br>6 | 68.1<br>7 | 1386<br>4 |

**Figure S1B**

**Sample size**

|   |                       |                     |                    |                      |
|---|-----------------------|---------------------|--------------------|----------------------|
|   | PAmCherry1<br>Plasmid | PAtagRFP<br>Plasmid | PAmKate<br>Plasmid | PAmCherry1<br>Genome |
| n | 8848 cells            | 6465 cells          | 7271 cells         | 6626 cells           |

Photoactivation t-half values were determined for individual cells analyzed (n = ~6000 to 9000). Logged t-half values were used for statistical analysis.

**Brown-Forsythe test**

|                                             |                  |
|---------------------------------------------|------------------|
| Brown-Forsythe test                         |                  |
| F (DFn, DFd)                                | 284.2 (3, 29204) |
| P value                                     | <0.0001          |
| P value summary                             | ****             |
| Are SDs significantly different (P < 0.05)? | Yes              |

→ The variances are significantly different.

**Welch's ANOVA test**

|                                           |                      |
|-------------------------------------------|----------------------|
| Welch's ANOVA test                        |                      |
| W (DFn, DFd)                              | 53642 (3.000, 14797) |
| P value                                   | <0.0001              |
| P value summary                           | ****                 |
| Significant diff. among means (P < 0.05)? | Yes                  |

→ The logged t-half values are significantly different.

### Games-Howell's multiple comparisons test

| Games-Howell's multiple comparisons test | Mean Diff. | 95.00% CI of diff.    | Significant? | Summary     | Adjusted P Value |      |       |       |
|------------------------------------------|------------|-----------------------|--------------|-------------|------------------|------|-------|-------|
| PAmCherry1 plasmid vs. PATagRFP plasmid  | -0.4189    | -0.4225 to -0.4153    | Yes          | ****        | <0.0001          |      |       |       |
| PAmCherry1 plasmid vs. PAmKate plasmid   | -0.4618    | -0.4669 to -0.4567    | Yes          | ****        | <0.0001          |      |       |       |
| PAmCherry1 plasmid vs. PAmCherry1 genome | 0.002900   | -0.001906 to 0.007707 | No           | ns          | 0.4073           |      |       |       |
| PATagRFP plasmid vs. PAmKate plasmid     | -0.04286   | -0.04698 to -0.03874  | Yes          | ****        | <0.0001          |      |       |       |
| PATagRFP plasmid vs. PAmCherry1 genome   | 0.4218     | 0.4180 to 0.4256      | Yes          | ****        | <0.0001          |      |       |       |
| PAmKate plasmid vs. PAmCherry1 genome    | 0.4647     | 0.4594 to 0.4699      | Yes          | ****        | <0.0001          |      |       |       |
| Test details                             | Mean 1     | Mean 2                | Mean Diff.   | SE of diff. | n1               | n2   | t     | DF    |
| PAmCherry1 plasmid vs. PATagRFP plasmid  | 1.487      | 1.906                 | -0.4189      | 0.001389    | 8848             | 6465 | 301.5 | 11735 |
| PAmCherry1 plasmid vs. PAmKate plasmid   | 1.487      | 1.948                 | -0.4618      | 0.001982    | 8848             | 7269 | 233.0 | 15071 |
| PAmCherry1 plasmid vs. PAmCherry1 genome | 1.487      | 1.484                 | 0.002900     | 0.001871    | 8848             | 6626 | 1.551 | 14833 |
| PATagRFP plasmid vs. PAmKate plasmid     | 1.906      | 1.948                 | -0.04286     | 0.001604    | 6465             | 7269 | 26.71 | 9057  |
| PATagRFP plasmid vs. PAmCherry1 genome   | 1.906      | 1.484                 | 0.4218       | 0.001465    | 6465             | 6626 | 287.9 | 8630  |
| PAmKate plasmid vs. PAmCherry1 genome    | 1.948      | 1.484                 | 0.4647       | 0.002036    | 7269             | 6626 | 228.3 | 13848 |

## Figure S3

### Sample

|   | Neighboring | Target |
|---|-------------|--------|
| n | 8           | 8      |

To analyze statistical difference between the photoactivation trends, areas under the curves (AUCs) of photoactivation ratio (RFP/RFP<sub>0</sub>) vs. time were determined for individual cells. Logged AUC values were used for the statistical analysis.

### Shapiro-Wilk normality test

| Shapiro-Wilk test                   | Neighboring | Target |
|-------------------------------------|-------------|--------|
| W                                   | 0.9694      | 0.9613 |
| P value                             | 0.8935      | 0.8220 |
| Passed normality test (alpha=0.05)? | Yes         | Yes    |
| P value summary                     | ns          | ns     |

→ Normality test was passed.

### F test to compare variances

|                                     |             |
|-------------------------------------|-------------|
| F test to compare variances         |             |
| F, DFn, Dfd                         | 1.842, 7, 7 |
| P value                             | 0.4389      |
| P value summary                     | ns          |
| Significantly different (P < 0.05)? | No          |

→ Variances are not significantly different

### Unpaired t test

|                                     |                |
|-------------------------------------|----------------|
| Unpaired t test                     |                |
| P value                             | 0.0011         |
| P value summary                     | **             |
| Significantly different (P < 0.05)? | Yes            |
| One- or two-tailed P value?         | Two-tailed     |
| t, df                               | t=4.108, df=14 |

→ The logged AUCs values are significantly different.

## Figure S4B

### Human cell

#### Sample size

|             | Column A:<br>Before<br>photoactivation | Column B:<br>After<br>photoactivation |
|-------------|----------------------------------------|---------------------------------------|
| Neighboring | 56 cells                               | 56 cells                              |

### Ratio paired t test

|                                          |                |
|------------------------------------------|----------------|
| Ratio paired t test                      |                |
| P value                                  | <0.0001        |
| P value summary                          | ****           |
| Significantly different (P < 0.05)?      | Yes            |
| One- or two-tailed P value?              | Two-tailed     |
| t, df                                    | t=38.26, df=55 |
| Number of pairs                          | 56             |
| How big is the difference?               |                |
| Geometric mean of ratios (B / A)         | 50.43          |
| SD of log(ratios)                        | 0.3330         |
| SEM of log(ratios)                       | 0.04450        |
| 95% confidence interval                  | 41.06 to 61.92 |
| R squared (partial eta squared)          | 0.9638         |
| How effective was the pairing?           |                |
| Correlation coefficient (r)              | 0.3877         |
| P value (one tailed)                     | 0.0016         |
| P value summary                          | **             |
| Was the pairing significantly effective? | Yes            |

### Yeast

#### Sample size

|             | Column A:<br>Before<br>photoactivation | Column B:<br>After<br>photoactivation |
|-------------|----------------------------------------|---------------------------------------|
| Neighboring | 96 cells                               | 96 cells                              |

Logged fluorescence values were used for statistical analysis.

### Ratio paired t test

|                                          |                |
|------------------------------------------|----------------|
| Ratio paired t test                      |                |
| P value                                  | <0.0001        |
| P value summary                          | ****           |
| Significantly different (P < 0.05)?      | Yes            |
| One- or two-tailed P value?              | Two-tailed     |
| t, df                                    | t=99.83, df=95 |
| Number of pairs                          | 96             |
| How big is the difference?               |                |
| Geometric mean of ratios (B / A)         | 2.243          |
| SD of log(ratios)                        | 0.03443        |
| SEM of log(ratios)                       | 0.003514       |
| 95% confidence interval                  | 2.207 to 2.279 |
| R squared (partial eta squared)          | 0.9906         |
| How effective was the pairing?           |                |
| Correlation coefficient (r)              | 0.6531         |
| P value (one tailed)                     | <0.0001        |
| P value summary                          | ****           |
| Was the pairing significantly effective? | Yes            |

→ The logged fluorescence values are significantly different.

## Figure S7

### Figure S7A

### Relative brightness

#### Sample size (cells)

|             | mGold | Ypet | mCitrine | mVenus(L46<br>M;Q69M) | mVenus<br>(L46F;I47V;C<br>48L) | mVenus<br>(Q204N;S205A<br>;K206S) | mVenus<br>(L46F;Q69M<br>) | mVenus<br>(L46F) | mVenus |
|-------------|-------|------|----------|-----------------------|--------------------------------|-----------------------------------|---------------------------|------------------|--------|
| Replicate 1 | 2543  | 6135 | 5886     | 4047                  | 3407                           | 3760                              | 4542                      | 3440             | 1752   |
| Replicate 2 | 5648  | 3621 | 4257     | 5658                  | 4061                           | 3377                              | 6430                      | 5476             | 4938   |
| Replicate 3 | 3853  | 4874 | 4686     | 4164                  | 5557                           | 5138                              | 4645                      | 4850             | 3208   |

For each replicate, the relative brightness of individual cells were determined and mean relative brightness was calculated (of the replicate). These mean relative brightness values were used for statistical analysis. n = 3 biological replicates.

### Brown-Forsythe test

|                                             |                |
|---------------------------------------------|----------------|
| Brown-Forsythe test                         |                |
| F (DFn, DFd)                                | 0.3007 (7, 16) |
| P value                                     | 0.9434         |
| P value summary                             | ns             |
| Are SDs significantly different (P < 0.05)? | No             |

→ The variances are not significantly different.

### ANOVA summary

|                                           |         |
|-------------------------------------------|---------|
| ANOVA summary                             |         |
| F                                         | 37.30   |
| P value                                   | <0.0001 |
| P value summary                           | ****    |
| Significant diff. among means (P < 0.05)? | Yes     |
| R squared                                 | 0.9423  |

→ The relative brightness values are significantly different.

### Bonferroni's multiple comparisons test

| Bonferroni's multiple comparisons test | Mean Diff. | 95.00% CI of diff. | Significant? | Summary     | Adjusted P Value |    |        |     |
|----------------------------------------|------------|--------------------|--------------|-------------|------------------|----|--------|-----|
| mGold vs. mVenus                       | 0.1903     | -0.07917 to 0.4598 | No           | ns          | 0.2788           |    |        |     |
| mVenus(L46F;I47V;C48L) vs. mVenus      | 0.3047     | 0.03517 to 0.5742  | Yes          | *           | 0.0225           |    |        |     |
| mVenus(Q204N;S205A;K206S) vs. mVenus   | -0.9074    | -1.177 to -0.6379  | Yes          | ****        | <0.0001          |    |        |     |
| mVenus(L46F) vs. mVenus                | 0.06167    | -0.2078 to 0.3312  | No           | ns          | >0.9999          |    |        |     |
| mVenus(L46F;Q69M) vs. mVenus           | -0.1963    | -0.4658 to 0.07317 | No           | ns          | 0.2462           |    |        |     |
| Test details                           | Mean 1     | Mean 2             | Mean Diff.   | SE of diff. | n1               | n2 | t      | D F |
| mGold vs. mVenus                       | 2.167      | 1.977              | 0.1903       | 0.09227     | 3                | 3  | 2.063  | 16  |
| mVenus(L46F;I47V;C48L) vs. mVenus      | 2.281      | 1.977              | 0.3047       | 0.09227     | 3                | 3  | 3.302  | 16  |
| mVenus(Q204N;S205A;K206S) vs. mVenus   | 1.069      | 1.977              | -0.9074      | 0.09227     | 3                | 3  | 9.834  | 16  |
| mVenus(L46F) vs. mVenus                | 2.038      | 1.977              | 0.06167      | 0.09227     | 3                | 3  | 0.6683 | 16  |
| mVenus(L46F;Q69M) vs. mVenus           | 1.780      | 1.977              | -0.1963      | 0.09227     | 3                | 3  | 2.128  | 16  |

### Photobleaching half-life

#### Sample size (cells)

|             | mGold | Ypet | mCitrine | mVenus(L46M;Q69M) | mVenus(L46F;I47V;C48L) | mVenus(Q204N;S205A;K206S) | mVenus(L46F;Q69M) | mVenus(L46F) | mVenus |
|-------------|-------|------|----------|-------------------|------------------------|---------------------------|-------------------|--------------|--------|
| Replicate 1 | 2543  | 6135 | 5886     | 4047              | 3407                   | 3760                      | 4542              | 3440         | 1752   |
| Replicate 2 | 5648  | 3621 | 4257     | 5658              | 4061                   | 3377                      | 6430              | 5476         | 4938   |
| Replicate 3 | 3853  | 4874 | 4686     | 4164              | 5557                   | 5138                      | 4645              | 4850         | 3208   |

For each replicate, the photobleaching half-lives of individual cells were determined and photobleaching half-life was calculated (of the replicate). These mean photobleaching half-life values were used for statistical analysis. n = 3 biological replicates.

#### Brown-Forsythe test

|                                             |               |
|---------------------------------------------|---------------|
| Brown-Forsythe test                         |               |
| F (DFn, DFd)                                | 1.560 (7, 16) |
| P value                                     | 0.2176        |
| P value summary                             | ns            |
| Are SDs significantly different (P < 0.05)? | No            |

→ The variances are not significantly different.

### ANOVA summary

|                                           |         |
|-------------------------------------------|---------|
| ANOVA summary                             |         |
| F                                         | 171.7   |
| P value                                   | <0.0001 |
| P value summary                           | ****    |
| Significant diff. among means (P < 0.05)? | Yes     |
| R squared                                 | 0.9869  |

→ The photobleaching half-life values are significantly different.

### Bonferroni's multiple comparisons test

| Bonferroni's multiple comparisons test | Mean Diff. | 95.00% CI of diff. | Significant? | Summary     | Adjusted P Value |    |       |    |
|----------------------------------------|------------|--------------------|--------------|-------------|------------------|----|-------|----|
| mGold vs. mVenus                       | 77.24      | 66.59 to 87.89     | Yes          | ****        | <0.0001          |    |       |    |
| mVenus(L46F;I47V;C48L) vs. mVenus      | 37.85      | 27.20 to 48.50     | Yes          | ****        | <0.0001          |    |       |    |
| mVenus(Q204N;S205A;K206S) vs. mVenus   | 73.34      | 62.69 to 83.99     | Yes          | ****        | <0.0001          |    |       |    |
| mVenus(L46F) vs. mVenus                | 40.08      | 29.43 to 50.73     | Yes          | ****        | <0.0001          |    |       |    |
| mVenus(L46F;Q69M) vs. mVenus           | -6.200     | -16.85 to 4.450    | No           | ns          | 0.5421           |    |       |    |
| Test details                           | Mean 1     | Mean 2             | Mean Diff.   | SE of diff. | n1               | n2 | t     | DF |
| mGold vs. mVenus                       | 100.6      | 23.40              | 77.24        | 3.646       | 3                | 3  | 21.18 | 16 |
| mVenus(L46F;I47V;C48L) vs. mVenus      | 61.25      | 23.40              | 37.85        | 3.646       | 3                | 3  | 10.38 | 16 |
| mVenus(Q204N;S205A;K206S) vs. mVenus   | 96.74      | 23.40              | 73.34        | 3.646       | 3                | 3  | 20.11 | 16 |
| mVenus(L46F) vs. mVenus                | 63.49      | 23.40              | 40.08        | 3.646       | 3                | 3  | 10.99 | 16 |
| mVenus(L46F;Q69M) vs. mVenus           | 17.20      | 23.40              | -6.200       | 3.646       | 3                | 3  | 1.700 | 16 |

Figure S7C

### Sample size (cells)

|         | Column A: mVenus |             |             | Column B: mGold |             |             |
|---------|------------------|-------------|-------------|-----------------|-------------|-------------|
|         | replicate 1      | replicate 2 | replicate 3 | replicate 1     | replicate 2 | replicate 3 |
| Trial 1 | 1143             | 694         | 1341        | 2363            | 484         | 603         |
| Trial 2 | 2429             | 2767        | 2088        | 4061            | 8341        | 4573        |

For each cell, the area under the curve of normalized fluorescence (F/F<sub>0</sub>) vs. time was calculated. For each replicate, the mean AUC was determined. Statistical analysis was performed on these mean AUCs.; n = 6 biological replicates.

### F test to compare variances

|                             |             |
|-----------------------------|-------------|
| F test to compare variances |             |
| F, DFn, Dfd                 | 2.797, 5, 5 |
| P value                     | 0.2834      |
| P value summary             | ns          |



|                                     |    |
|-------------------------------------|----|
| Significantly different (P < 0.05)? | No |
|-------------------------------------|----|

→ The variances are not significantly different.

### Unpaired t test

|                                     |                |
|-------------------------------------|----------------|
| Unpaired t test                     |                |
| P value                             | <0.0001        |
| P value summary                     | ****           |
| Significantly different (P < 0.05)? | Yes            |
| One- or two-tailed P value?         | Two-tailed     |
| t, df                               | t=8.472, df=10 |

→ The AUC values are significantly different.

### Figure S7D

#### Sample size (cells)

|         | Column A: mVenus |             |             | Column B: mGold |             |             |
|---------|------------------|-------------|-------------|-----------------|-------------|-------------|
|         | replicate 1      | replicate 2 | replicate 3 | replicate 1     | replicate 2 | replicate 3 |
| Trial 1 | 183              | 206         | 152         | 219             | 197         | 208         |
| Trial 2 | 165              | 161         | 140         | 216             | 267         | 164         |

For each cell, the area under the curve of normalized fluorescence (F/F<sub>0</sub>) vs. time was calculated. For each replicate, the mean AUC was determined. Statistical analysis was performed on these mean AUCs.; n = 6 biological replicates.

#### F test to compare variances

|                                      |             |
|--------------------------------------|-------------|
| F test to compare variances          |             |
| F, DF <sub>n</sub> , DF <sub>d</sub> | 3.360, 5, 5 |
| P value                              | 0.2095      |
| P value summary                      | ns          |
| Significantly different (P < 0.05)?  | No          |

→ The variances are not significantly different.

### Unpaired t test

|                                        |                |
|----------------------------------------|----------------|
| Unpaired t test                        |                |
| P value                                | <0.0001        |
| P value summary                        | ****           |
| Significantly different (P < 0.05)?    | Yes            |
| One- or two-tailed P value?            | Two-tailed     |
| t, df                                  | t=92.81, df=10 |
| How big is the difference?             |                |
| Mean of column A                       | 98.87          |
| Mean of column B                       | 228.4          |
| Difference between means (B - A) ± SEM | 129.5 ± 1.395  |
| 95% confidence interval                | 126.4 to 132.6 |
| R squared (eta squared)                | 0.9988         |

→ The AUC values are significantly different.

### Figure S7E

#### Sample size (cells)

|   | Column A:<br>mVenus | Column<br>B: mGold |
|---|---------------------|--------------------|
| n | 17                  | 15                 |

### Shapiro-Wilk test

| Shapiro-Wilk test                   | mVenus | mGold  |
|-------------------------------------|--------|--------|
| W                                   | 0.9434 | 0.9742 |
| P value                             | 0.3603 | 0.9151 |
| Passed normality test (alpha=0.05)? | Yes    | Yes    |
| P value summary                     | ns     | ns     |

Normality test is passed.

### F test to compare variances

|                                     |               |
|-------------------------------------|---------------|
| F test to compare variances         |               |
| F, DFn, Dfd                         | 5.422, 14, 16 |
| P value                             | 0.0019        |
| P value summary                     | **            |
| Significantly different (P < 0.05)? | Yes           |

→ The variances are significantly different.

### Unpaired t test with Welch's correction

|                                         |                   |
|-----------------------------------------|-------------------|
| Unpaired t test with Welch's correction |                   |
| P value                                 | <0.0001           |
| P value summary                         | ****              |
| Significantly different (P < 0.05)?     | Yes               |
| One- or two-tailed P value?             | Two-tailed        |
| Welch-corrected t, df                   | t=17.64, df=18.50 |
| How big is the difference?              |                   |
| Mean of column A                        | 40.55             |
| Mean of column B                        | 68.09             |
| Difference between means (B - A) ± SEM  | 27.54 ± 1.561     |
| 95% confidence interval                 | 24.27 to 30.81    |
| R squared (eta squared)                 | 0.9439            |

### F test to compare variances

|                                     |             |
|-------------------------------------|-------------|
| F test to compare variances         |             |
| F, DFn, Dfd                         | 3.972, 2, 2 |
| P value                             | 0.4023      |
| P value summary                     | ns          |
| Significantly different (P < 0.05)? | No          |

→ The variances are not significantly different.

### Unpaired t-test

|                                     |               |
|-------------------------------------|---------------|
| Unpaired t test                     |               |
| P value                             | 0.0006        |
| P value summary                     | ***           |
| Significantly different (P < 0.05)? | Yes           |
| One- or two-tailed P value?         | Two-tailed    |
| t, df                               | t=9.843, df=4 |

→ The logged AUCs values are significantly different.

## Figure S8G

### Sample size (transfections)

|  |                     |                    |
|--|---------------------|--------------------|
|  | Column A:<br>mVenus | Column<br>B: mGold |
|--|---------------------|--------------------|

|   |   |   |
|---|---|---|
| n | 3 | 3 |
|---|---|---|

n = 3 biological replicates.

### Mann Whitney test

|                                     |            |
|-------------------------------------|------------|
| Mann Whitney test                   |            |
| P value                             | 0.1000     |
| Exact or approximate P value?       | Exact      |
| P value summary                     | ns         |
| Significantly different (P < 0.05)? | No         |
| One- or two-tailed P value?         | Two-tailed |
| Sum of ranks in column A,B          | 15 , 6     |
| Mann-Whitney U                      | 0          |
| Difference between medians          |            |
| Median of column A                  | 1.430, n=3 |
| Median of column B                  | 1.357, n=3 |
| Difference: Actual                  | -0.07323   |
| Difference: Hodges-Lehmann          | -0.07323   |

→ The cytotoxicity values are not significantly different.

## Figure S8l

### Sample size (cells)

| Column A: mVenus |             |             | Column B: mGold |             |             |
|------------------|-------------|-------------|-----------------|-------------|-------------|
| Replicate 1      | Replicate 2 | Replicate 3 | Replicate 1     | Replicate 2 | Replicate 3 |
| 632              | 562         | 2454        | 407             | 598         | 4438        |

For each replicate, image analysis was conducted to determine the fluorescence intensities of individual cells and calculate the mean fluorescence intensity (of the replicate). Statistical analysis was performed on these mean fluorescence intensity values; n = 3 biological replicates.

### F test to compare variances

|                                     |             |
|-------------------------------------|-------------|
| <b>F test to compare variances</b>  |             |
| F, DFn, Dfd                         | 1.555, 2, 2 |
| P value                             | 0.7829      |
| P value summary                     | ns          |
| Significantly different (P < 0.05)? | No          |

→ The variances are not significantly different.

### Unpaired t-test

|                                     |                |
|-------------------------------------|----------------|
| P value                             | <b>0.3286</b>  |
| P value summary                     | ns             |
| Significantly different (P < 0.05)? | No             |
| One- or two-tailed P value?         | Two-tailed     |
| t, df                               | t=0.2738, df=4 |
| t, df                               | t=9.843, df=4  |

→ The brightness values are not significantly different.
